# Supplementary material
Source: PubMed Central journal article supplement (PMC5384696)
Supplement: NIHMS777365-supplement.pdf [file NIHMS777365-supplement.pdf]

**Appendix Figure 1.** The model diagram. Population are divided into influenza-related age-dependent epidemiological classes: susceptible ( $S_k$ ); vaccinated with LAIV ( $VL_k$ ); vaccinated with IIV ( $VT_k$ ); latently infected ( $E_k$ ); asymptotically or symptomatically infected ( $A_k$  or  $I_k$ ); recovered ( $R_k$ ) and dead due to influenza illness ( $D_k$ ). The subscript  $k$  indicates these age groups ( $k = 1, \dots, 6$ ). The age groups used for our model were 0-6 months, 6 months-2 yr, 2-8 yr, 8-19 yr, 20-64 yr, and  $\geq 65$  yr.

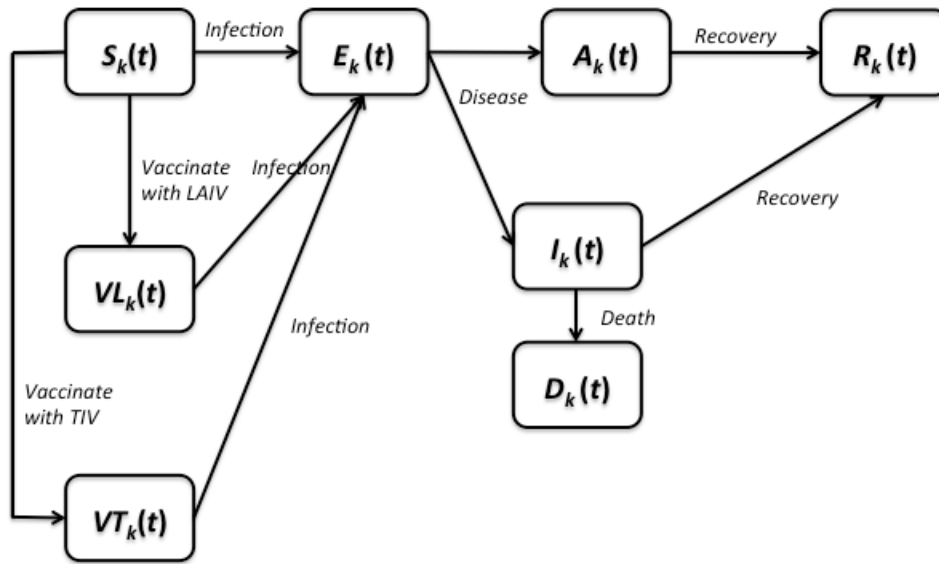

**Appendix Figure2.** Age-specific cumulative vaccine coverage levels in the 2012-2013 influenza season in the U.S. We assume that all age groups are vaccinated according to the average monthly influenza vaccination likelihood observed in the 2012-2013 influenza season in the U.S.

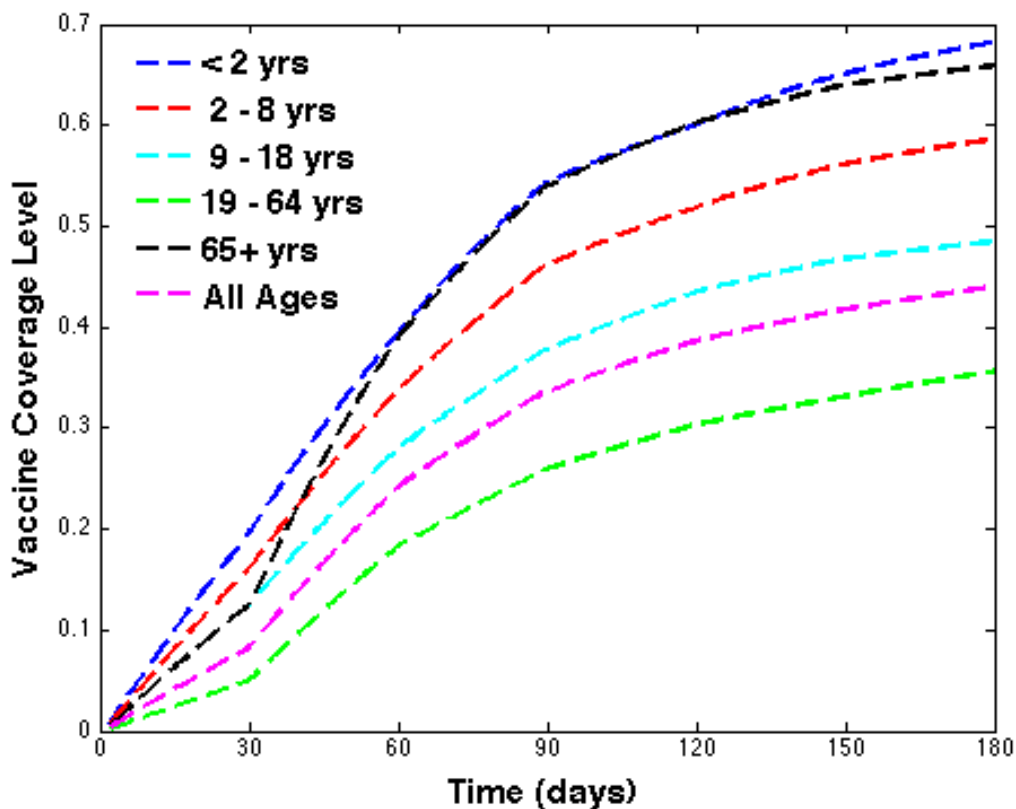

**Parameterization of  $\sigma_k$  and  $\omega_k$  Using the Attack Rates (Cumulative Incidence) in the Unvaccinated and Vaccinated Groups**

Shim et al. derived the expression for  $\Omega_{A0}$  and  $\Omega_{A1}$  based on the attack rates calculated from a mathematical model of disease transmission where  $\Omega_{A0}$  and  $\Omega_{A1}$  represent the attack rates (cumulative incidence) in the unvaccinated and vaccinated groups, respectively.<sup>21</sup> Specifically,  $\Omega_{A0}$  and  $\Omega_{A1}$  are expressed in the following implicit equations using the vaccine coverage ( $f$ ), the average length of infected period ( $\tau$ ), transmission rate ( $\beta$ ) and the reduction in relative risk of infection among the vaccinated compared to the unvaccinated ( $\sigma$ ):

$$\begin{aligned}\Omega_{A0} &= 1 - \exp[-\beta\{\tau(1-f)\Omega_{A0} + \tau f\Omega_{A1}\}], \\ \Omega_{A1} &= 1 - \exp[-\beta(1-\sigma)\{\tau(1-f)\Omega_{A0} + \tau f\Omega_{A1}\}].\end{aligned}$$

In addition, the vaccine effectiveness is defined as

$$VE = 1 - \frac{\Omega_{A1}(1 - \Omega_{A0})}{\Omega_{A0}(1 - \Omega_{A1})}.$$

Using the equations above, we estimated  $\sigma$  based on the vaccine effectiveness of our choice and the baseline parameter values of our model. For instance, when the vaccine coverage is 47% ( $f=0.47$ ), consistent with the observations,  $\sigma=0.13$  and  $\sigma=0.18$  give the vaccine effectiveness of 15% and 20%, respectively.
